# Supplementary material
Source: PubMed Central journal article supplement (PMC5985656)

DMNTre

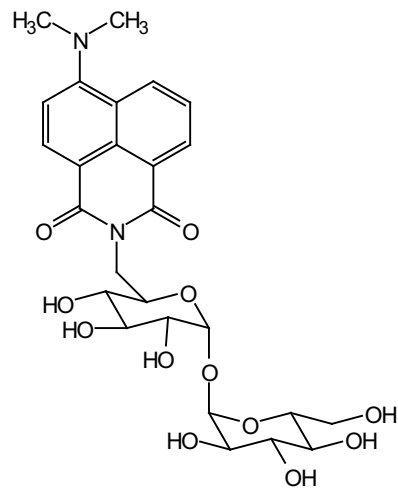

8.26  
8.25  
8.17  
8.16  
7.99  
7.98  
— 7.49  
6.95  
6.93  
4.98  
4.97  
4.53  
4.52  
4.25  
4.24  
4.03  
3.81  
3.79  
3.77  
3.71  
3.68  
3.67  
3.65  
3.65  
3.64  
3.63  
3.58  
3.57  
3.56  
3.55  
3.47  
3.45  
3.43  
3.36  
3.20  
3.18  
3.17  
3.08

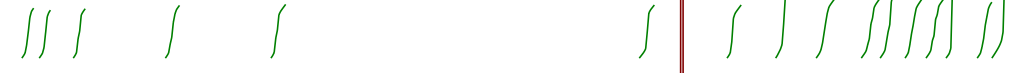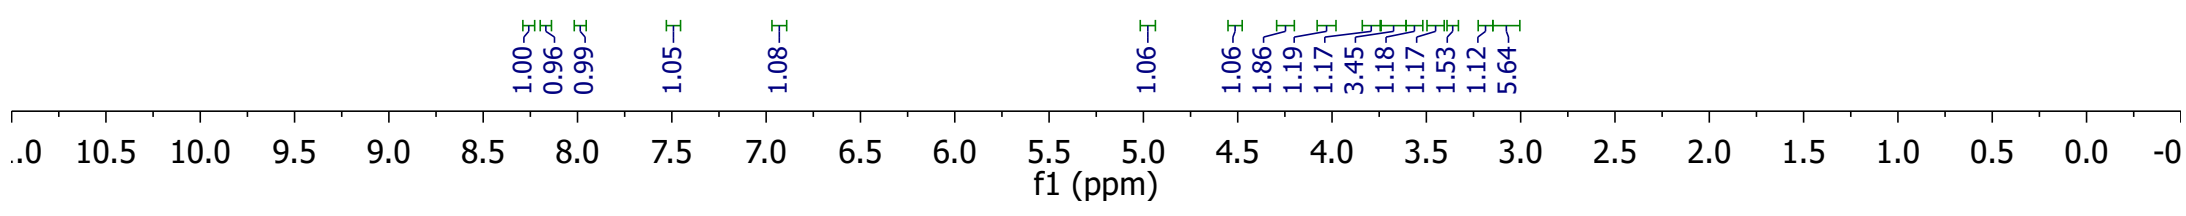

DMNTre

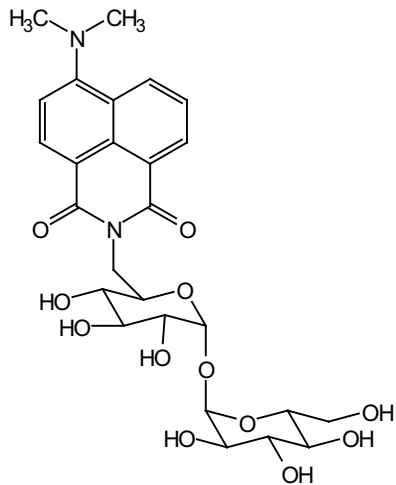

166.16  
165.34

157.94

134.16  
133.31  
132.29  
130.33  
125.19  
124.04  
121.44  
113.22  
111.71

94.03  
93.86  
93.82  
73.84  
73.62  
73.47  
73.03  
72.08  
71.94  
70.61  
70.19  
61.53

44.93  
41.79

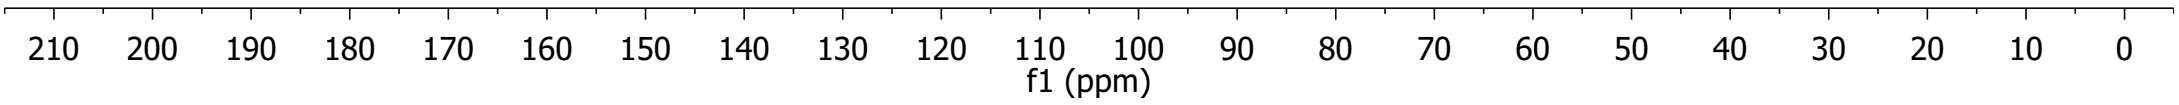

DMNGlc

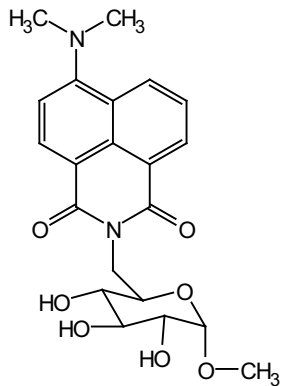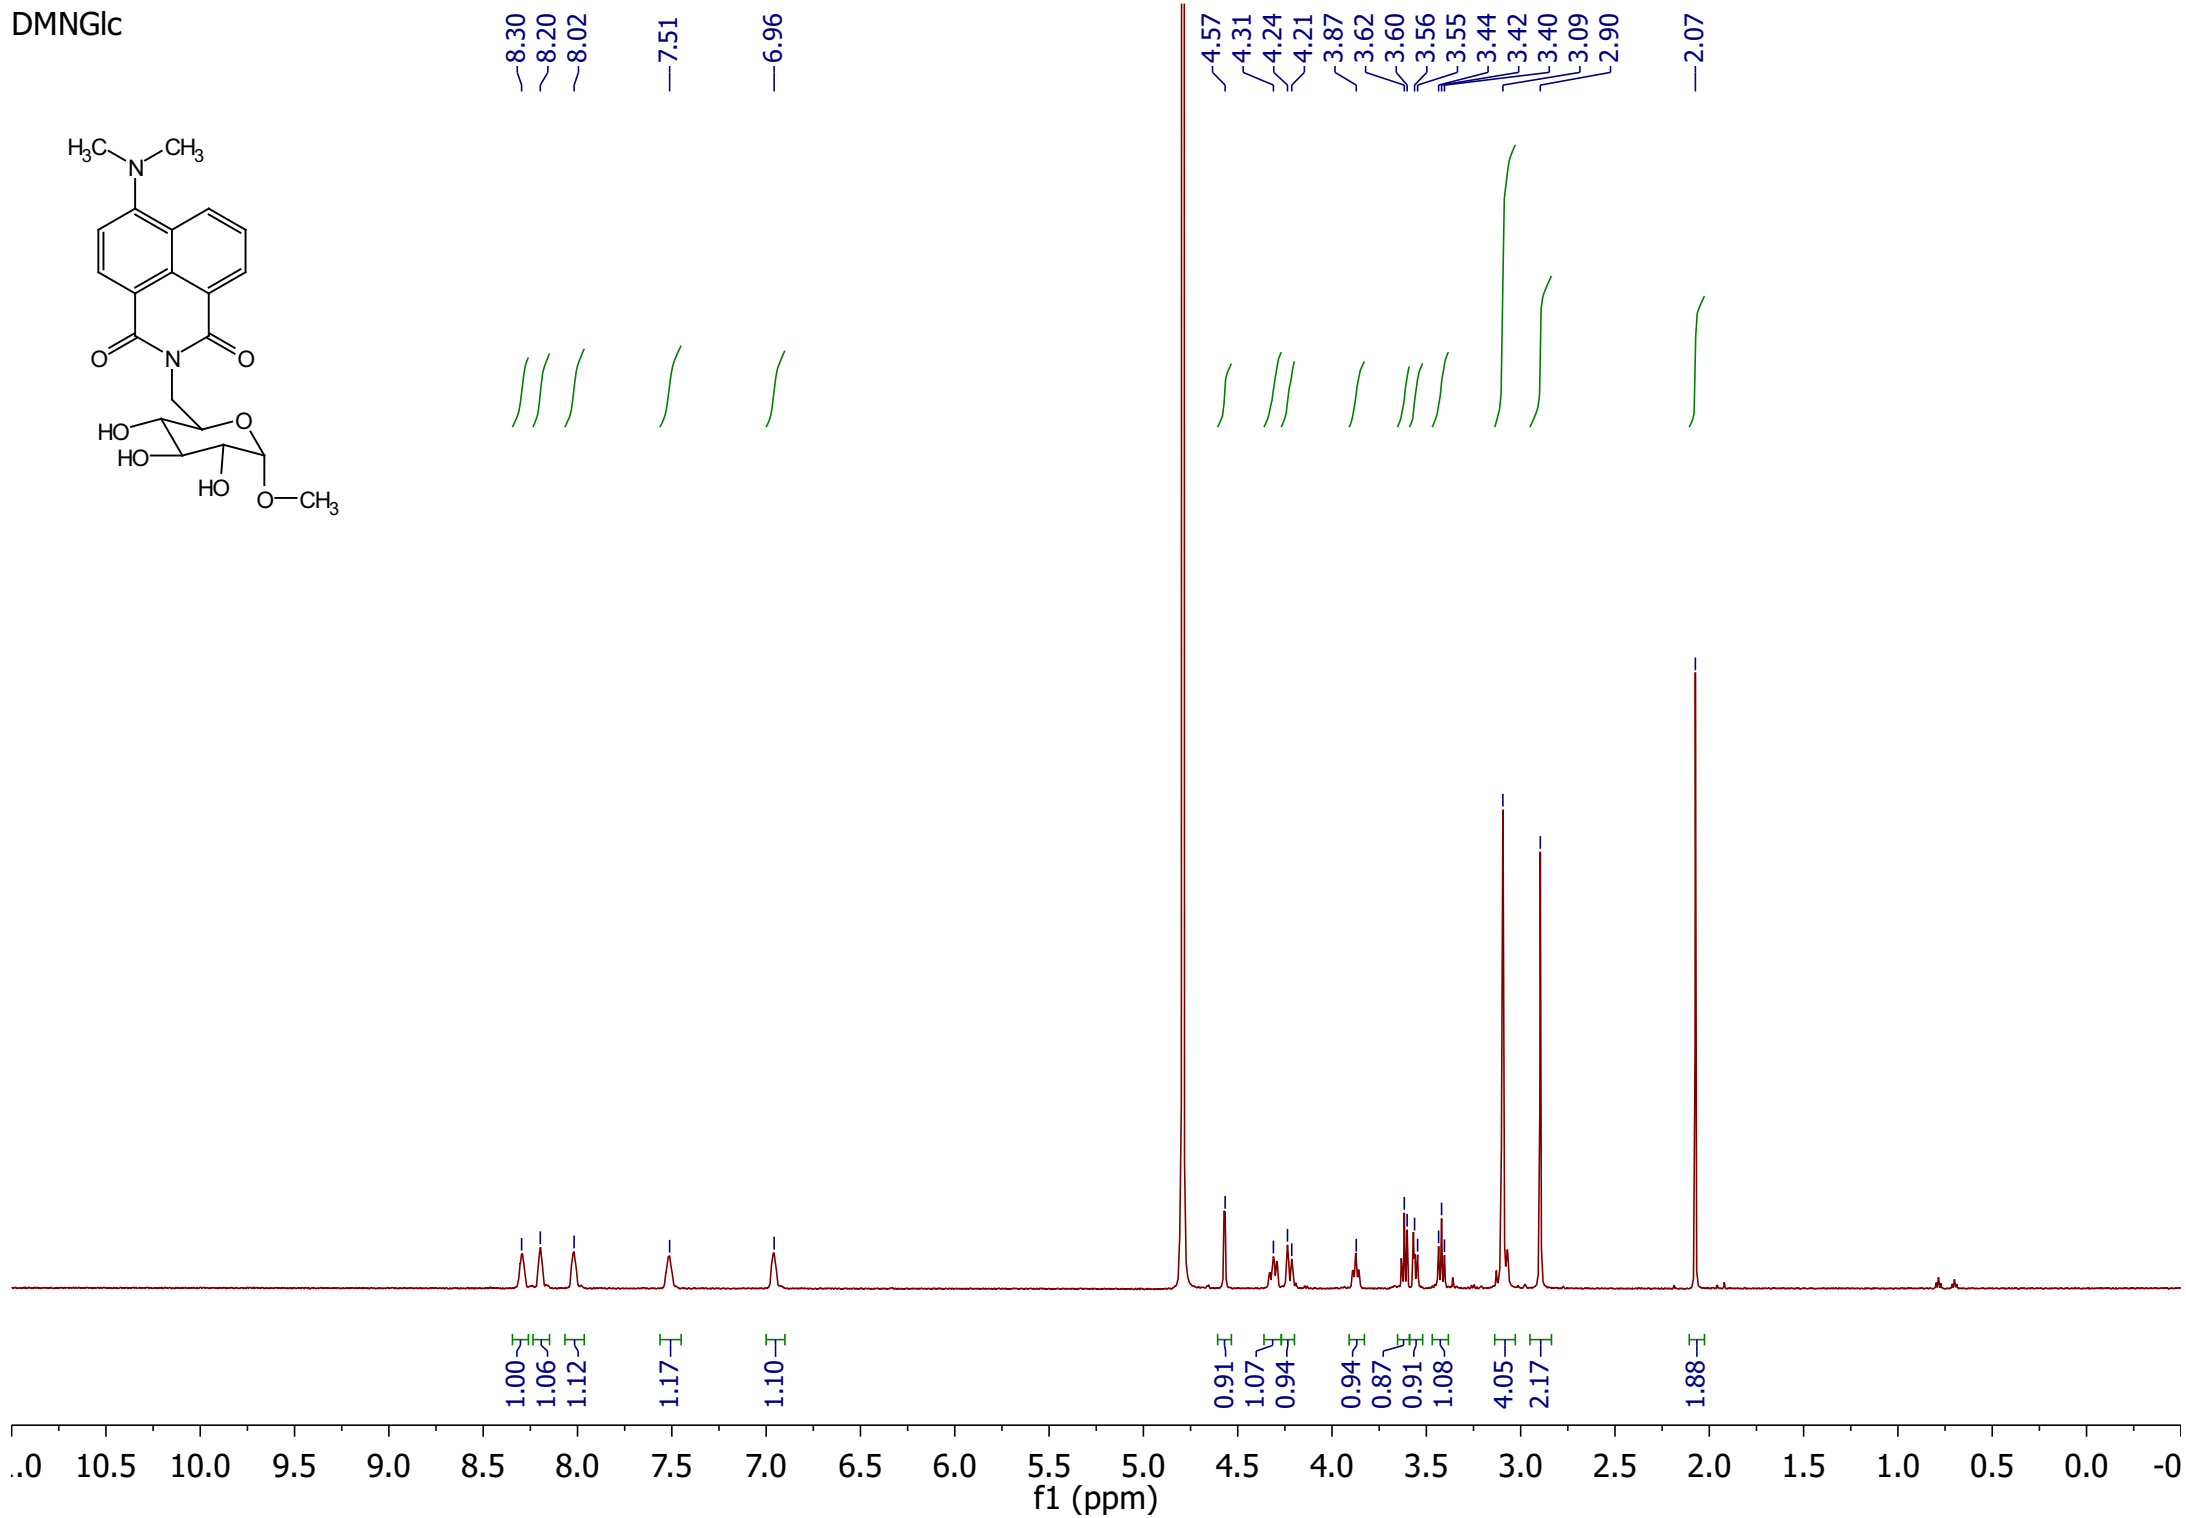

DMNGlc

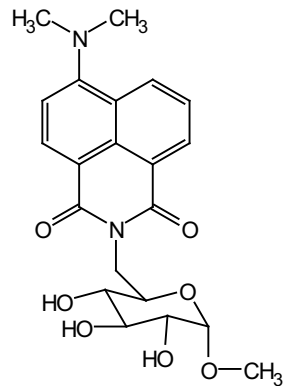

165.82  
164.93

157.42

133.99  
133.72  
133.14  
132.86  
132.08  
131.79  
130.11  
124.77  
124.65  
123.45  
121.12  
112.67  
112.51  
111.06

100.00  
99.87

74.14  
73.98  
73.91  
73.79  
72.33  
72.16  
69.12  
68.97  
55.33  
55.11  
45.09  
44.85  
44.60  
44.37  
42.15  
42.00  
41.86

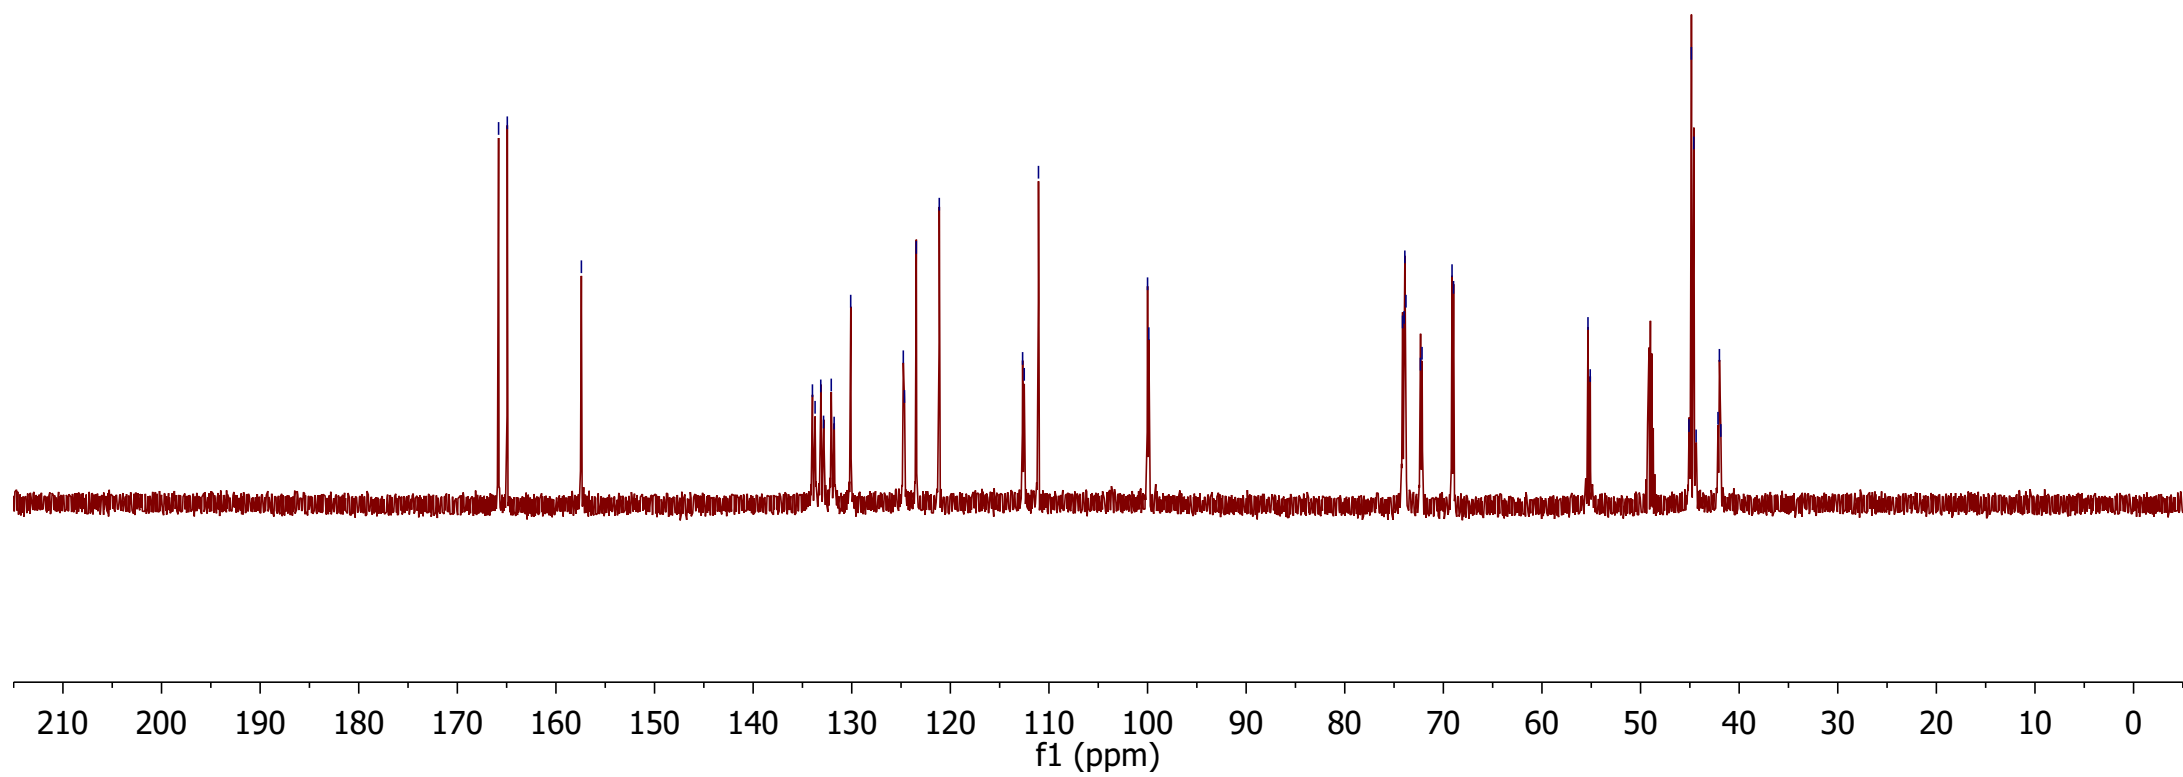

Supplement: NIHMS968865-supplement-Supporting_Information.pdf [file NIHMS968865-supplement-Supporting_Information.pdf]
